# Supplementary material
Source: PubMed Central journal article supplement (PMC547845)

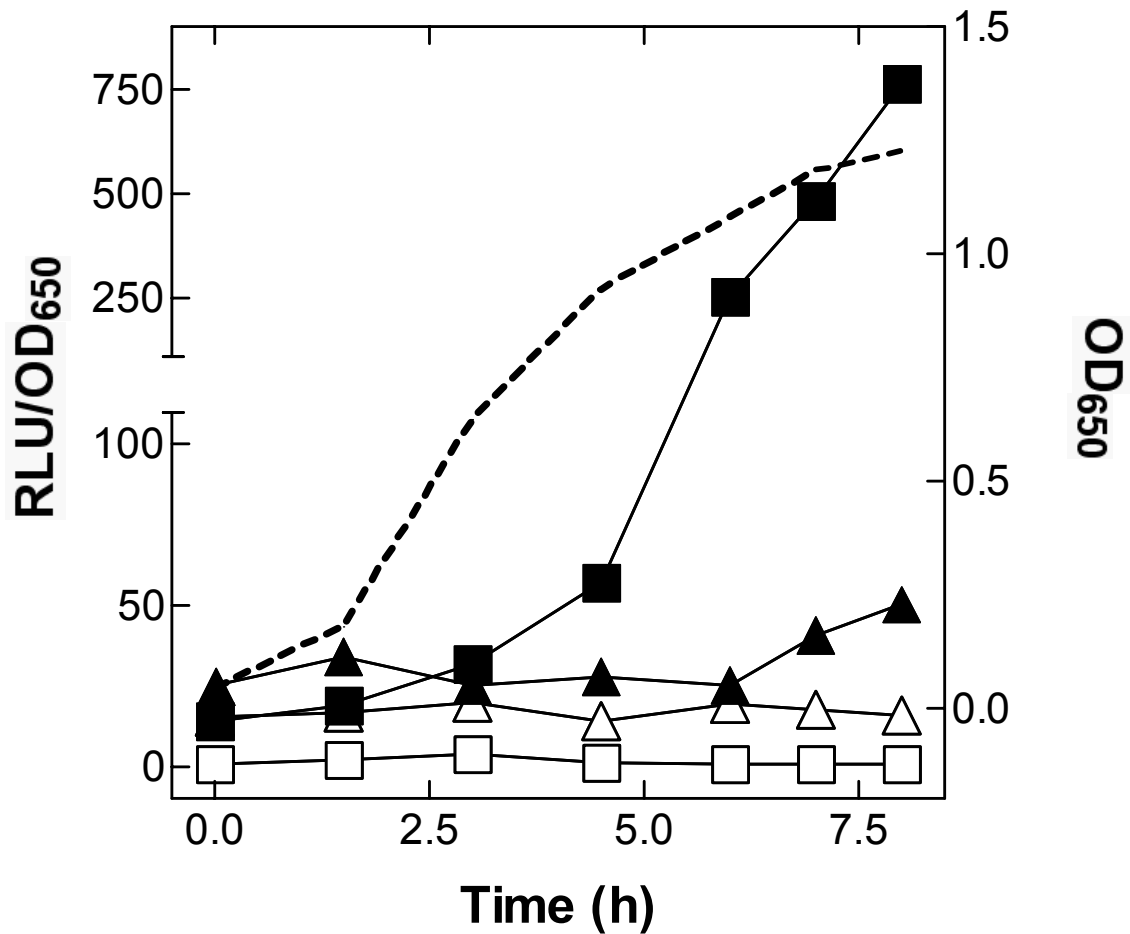

Supplement: pnas_102_5_1691__1.pdf [file pnas_102_5_1691__1.pdf]
